# Supplementary material for: Lung Epithelial Regulation of BCL2 Related Protein A1 (BCL2A1) by Coronaviruses (SARS-CoV) and Type I Interferon Signaling
Source: bioRxiv or medRxiv preprint supplement (doi:10.1101/2021.07.21.453244), 2021-07-21
Supplement: Supplementary file [file media-1.pdf]

**SUPPLEMENTARY DATA**

**BCL2A1**

| <b>IMMGEN</b>      | Species | Tissue      | Symbol  | fold change | Treatment |
|--------------------|---------|-------------|---------|-------------|-----------|
| polyICvsVe         | Mouse   | AlveolarMac | Bcl2a1a | 2           | PolyIC    |
| <b>Interferome</b> |         |             |         |             |           |
| IFNA vs Ve         | Human   | Monocyte    | BCL2A1  | 3.3         | IFN       |
| GMCSF vs           | Mouse   | MDSC        | Bcl2a1a | suppression | GM-CSF    |
| GMCSF+IFNg         |         |             |         |             | +IFNg     |

**Transcriptomic data** VE= vehicle (control)

| <b>Experimen</b>      | <b>Species</b> | <b>Tissue</b> | <b>Probe</b> | <b>Symbol</b> | <b>Fold Chang</b> | <b>P-value</b> | <b>Treatment</b> |                  |
|-----------------------|----------------|---------------|--------------|---------------|-------------------|----------------|------------------|------------------|
| IL1B vs Ve            | Human          | hepatocyte    | 205681_at    | BCL2A1        | 4.08561           | 0              | IL1B             | <b>IL-1 BETA</b> |
| IL1B vs Ve            | Human          | hepatocyte    | 205681_at    | BCL2A1        | 7.158266          | 0              | IL1B             |                  |
| IL1B vs Ve            | Human          | hepatocyte    | 205681_at    | BCL2A1        | 3.069695          | 0              | IL1B             |                  |
| IL1B vs Ve            | Human          | hepatocyte    | 205681_at    | BCL2A1        | 3.230141          | 0              | IL1B             |                  |
| IL1B vs Ve            | Human          | hepatocyte    | 205681_at    | BCL2A1        | 2.845869          | 0              | IL1B             |                  |
| IL1B vs Ve            | Human          | hepatocyte    | 205681_at    | BCL2A1        | 7.758253          | 0              | IL1B             |                  |
| IL1B vs Ve            | Human          | hepatocyte    | 205681_at    | BCL2A1        | 3.124503          | 0              | IL1B             |                  |
| IL1B vs Ve            | Human          | hepatocyte    | 205681_at    | BCL2A1        | 7.947128          | 0              | IL1B             |                  |
| TNF vs Ve             | Human          | epithelium    | 7990818      | BCL2A1        | 7.919604          | 0.001424       | TNF              | <b>TNF-ALPHA</b> |
| TNF vs Ve             | Human          | hepatocyte    | 205681_at    | BCL2A1        | 2.236581          | 1.31E-08       | TNF              |                  |
| TNF vs Ve             | Human          | hepatocyte    | 205681_at    | BCL2A1        | 2.869731          | 6E-10          | TNF              |                  |
| TNF vs Ve             | Human          | hepatocyte    | 205681_at    | BCL2A1        | 2.684751          | 1.2E-09        | TNF              |                  |
| TNF vs Ve             | Human          | epidermis,    | ILMN_176     | BCL2A1        | 2.009518          | 0.010482       | TNF              |                  |
| FGF19 + T             | Human          | epithelium    | 7990818      | BCL2A1        | 4.836208          | 0.003608       | FGF19,TNF        |                  |
| LPS vs Veh            | Norway Ra      | whole liver   | 1368482_ε    | Bcl2a1        | 6.153416          | 0.000231       | LPS              | <b>TLR</b>       |
| LPS vs Veh            | Human          | hepatocyte    | 205681_at    | BCL2A1        | 6.314044          | 0              | LPS              |                  |
| LPS vs Veh            | Norway Ra      | whole liver   | 1368482_ε    | Bcl2a1        | 5.880627          | 0.000311       | LPS              |                  |
| LPS vs Veh            | Norway Ra      | whole liver   | 1368482_ε    | Bcl2a1        | 2.689758          | 0.031984       | LPS              |                  |
| LPS vs Veh            | Human          | hepatocyte    | 205681_at    | BCL2A1        | 2.838135          | 6E-10          | LPS              |                  |
| LPS vs Veh            | Norway Ra      | whole liver   | 1368482_ε    | Bcl2a1        | 6.090048          | 0.000247       | LPS              |                  |
| LPS vs Veh            | Human          | hepatocyte    | 205681_at    | BCL2A1        | 4.861197          | 0              | LPS              |                  |
| LPS vs Veh            | Norway Ra      | whole liver   | 1368482_ε    | Bcl2a1        | 6.043804          | 0.00026        | LPS              |                  |
| LPS vs Veh            | Human          | hepatocyte    | 205681_at    | BCL2A1        | 4.242685          | 0              | LPS              |                  |
| P3CSK4 vs             | Human          | myeloid lir   | BCL2A1 9ε    | BCL2A1        | 2.782493          | 5.77E-08       | P3CSK4           | <b>TLR</b>       |
| P3CSK4 vs             | Human          | myeloid lir   | BCL2A1 9ε    | BCL2A1        | 5.574397          | 0              | P3CSK4           |                  |
| 125DVD3 \             | Human          | myeloid lir   | 205681_at    | BCL2A1        | 8.510467          | 2.81E-05       | 125DVD3          | <b>STEROID</b>   |
| 125DVD3 \             | Human          | smooth m      | BCL2A1 9ε    | BCL2A1        | 2.520448          | 0.0012         | 125DVD3          | <b>VITAM D3</b>  |
| 125DVD3 \             | Human          | smooth m      | BCL2A1 9ε    | BCL2A1        | 7.105617          | 0.0006         | 125DVD3          |                  |
| <b>DOWN-REGULATED</b> |                |               |              |               |                   |                |                  |                  |
| TGFB2 vs \            | Human          | other, fibr   | 205681_at    | BCL2A1        | -2.42428          | 0.007574       | TGFB2            | <b>TGF BETA</b>  |
| TGFB1 vs \            | Human          | other, fibr   | 205681_at    | BCL2A1        | -2.52269          | 0.006081       | TGFB1            |                  |
| TGFB1 vs \            | Human          | hepatocyte    | 205681_at    | BCL2A1        | -4.42311          | 6E-10          | TGFB1            |                  |
| TGFB1 vs \            | Human          | hepatocyte    | 205681_at    | BCL2A1        | -4.59256          | 4E-10          | TGFB1            |                  |
| TGFB1 vs \            | Human          | hepatocyte    | 205681_at    | BCL2A1        | -4.94485          | 2E-10          | TGFB1            |                  |
| DEX vs Ve             | Norway Ra      | whole liver   | 1368482_ε    | Bcl2a1        | -2.91714          | 2.52E-05       | DEX              | <b>STEROID</b>   |
| DEX vs Ve             | Norway Ra      | whole liver   | 1368482_ε    | Bcl2a1        | -3.78112          | 6.78E-07       | DEX              | <b>DEXAMETH</b>  |
| DEX vs Ve             | Norway Ra      | whole liver   | 1368482_ε    | Bcl2a1        | -2.63061          | 0.000103       | DEX              |                  |
| DEX vs Ve             | Norway Ra      | whole liver   | 1368482_ε    | Bcl2a1        | -2.86176          | 3.28E-05       | DEX              |                  |

|                                                   |          |          |     |
|---------------------------------------------------|----------|----------|-----|
| DEX vs Veh Norway Ra whole liver A_42_P51 Bcl2a1  | -3.92259 | 0.000206 | DEX |
| DEX vs Veh Norway Ra whole liver A_42_P51 Bcl2a1  | -4.57337 | 8.82E-05 | DEX |
| DEX vs Veh Norway Ra whole liver 1368482_ε Bcl2a1 | -2.37092 | 0.000413 | DEX |
| DEX vs Veh Norway Ra whole liver 1368482_ε Bcl2a1 | -2.00596 | 0.003401 | DEX |
| DEX vs Veh Norway Ra whole liver 1368482_ε Bcl2a1 | -2.91024 | 2.6E-05  | DEX |
| DEX vs Veh Norway Ra whole liver 1368482_ε Bcl2a1 | -4.36257 | 9.24E-08 | DEX |
| DEX vs Veh Norway Ra whole liver 1368482_ε Bcl2a1 | -3.6783  | 9.97E-07 | DEX |
| DEX vs Veh Human epithelium BCL2A1 BCL2A1         | -3.61125 | 1E-10    | DEX |
| DEX vs Veh Human hepatocyte 205681_at BCL2A1      | -2.68814 | 4.22E-06 | DEX |
| DEX vs Veh Norway Ra whole liver 1368482_ε Bcl2a1 | -2.24437 | 0.000368 | DEX |

---

**BCL2L14**

**INTERFEROME DATA**

| DATASET ID | FOLD      | TREATMENT | TYPE OF    | PROBESET    | PROMOTER TF DATA  |  |
|------------|-----------|-----------|------------|-------------|-------------------|--|
|            | INDUCTION | TIME      | INTERFERON |             | STAT1,STAT3,NF-KB |  |
| 47         | 3.9       | 5 HR      | Type I     | 221241_s_at |                   |  |
| 301        | 7         | 6 HR      | Type I     | 7953993     |                   |  |

**TRANSCRIPTOMIC DATA**

| Experiment | Species  | Tissue       | Probe         | Symbol  | Fold Change | P-value  | Treatment |
|------------|----------|--------------|---------------|---------|-------------|----------|-----------|
| IFNA1 vs V | Human    | hepatocyte   | 221241_s_     | BCL2L14 | 23.89382    | 0        | IFNA1     |
| IFNB1 vs C | Human    | epithelium   | BCL2L14       | BCL2L14 | 4.917129    | 0.001162 | IFNB1     |
| IFNA1 vs V | Human    | hepatocyte   | 221241_s_     | BCL2L14 | 4.103503    | 8E-09    | IFNA1     |
| IFNG vs Ve | Human    | myeloid      | lir BCL2L14 9 | BCL2L14 | 9.694558    | 0        | IFNG      |
| IFNA1 vs V | Human    | hepatocyte   | 221241_s_     | BCL2L14 | 13.41221    | 0        | IFNA1     |
| IFNG vs Ve | Human    | epidermis,   | 221241_s_     | BCL2L14 | 3.112359    | 0.010527 | IFNG      |
| IFNA1 vs V | Human    | hepatocyte   | 221241_s_     | BCL2L14 | 19.09894    | 0        | IFNA1     |
| IFNB1 vs C | Human    | epithelium   | BCL2L14       | BCL2L14 | 4.367666    | 0.005981 | IFNB1     |
| IFNA1 vs V | Human    | hepatocyte   | 221241_s_     | BCL2L14 | 6.341885    | 2E-10    | IFNA1     |
| TGFB2 vs V | Human    | other, fibr  | 221241_s_     | BCL2L14 | -3.8638     | 0.021441 | TGFB2     |
| TGFB2 vs V | Human    | other, fibr  | 1552841_s_    | BCL2L14 | -2.97559    | 0.002472 | TGFB2     |
| 17BE2 vs V | Human    | epithelium   | NM_13872      | BCL2L14 | -8.69614    | 0.002503 | 17BE2     |
| 17BE2 vs V | Human    | epithelium   | NM_03076      | BCL2L14 | -8.69614    | 0.002503 | 17BE2     |
| 17BE2 vs V | Human    | epithelium   | NM_13872      | BCL2L14 | -8.69614    | 0.002503 | 17BE2     |
| DHT vs Ve  | Human    | epithelium   | 1552841_s_    | BCL2L14 | -4.45158    | 0.025096 | DHT       |
| DEX vs Ve  | Human    | lymphoid l   | 221241_s_     | BCL2L14 | 3.300185    | 0.041228 | DEX       |
| DEX vs Ve  | Human    | eye, lens, e | 221241_s_     | BCL2L14 | 3.397556    | 0.022652 | DEX       |
| RU486 + D  | Human    | epithelium   | 233464_at     | BCL2L14 | 4.506866    | 0.036092 | DEX,RU486 |
| RIP140/NR  | Human    | pluripoten   | 1552841_s_    | BCL2L14 | 7.922585    | 0.000801 | ATRA      |
| RIP140/NR  | Human    | pluripoten   | 1552841_s_    | BCL2L14 | 7.922585    | 0.000801 | ATRA      |
| ATRA vs Ve | House Mo | pluripoten   | Bcl2l14 10    | Bcl2l14 | -2.88126    | 0.00005  | ATRA      |
| ATRA vs Ve | Human    | pluripoten   | 1552841_s_    | BCL2L14 | 2.76016     | 0.040375 | ATRA      |

### BCL3

#### INTERFEROME DATA

| DATASET ID | FOLD INDUCTION | TREATMENT TIME | TYPE OF INTERFERON | PROBESET     | PROMOTER TF DATA<br>STAT1,STAT3,NF-KB |
|------------|----------------|----------------|--------------------|--------------|---------------------------------------|
| 306        | 2.5            | 1.5HR          | TYPE I             | 204908_s_at  |                                       |
| 282        | 4.3            | 10 HR          | TYPE I             | ILMN_2749717 |                                       |

#### TRANSCRIPTOME DATA

| Experiment  | Species   | Tissue       | Probe     | Symbol | Fold Change | P-value  | TREATMENT |
|-------------|-----------|--------------|-----------|--------|-------------|----------|-----------|
| TNF vs Veh  | Human     | epidermis,   | ILMN_1711 | BCL3   | 4.288766    | 8.12E-07 | TNF       |
| LPS vs Veh  | Norway Ra | whole liver  | 1398482_ε | Bcl3   | 11.62403    | 7.28E-08 | LPS       |
| LPS vs Veh  | Norway Ra | whole liver  | 1380414_ε | Bcl3   | 2.730324    | 0.000159 | LPS       |
| LPS vs Veh  | Norway Ra | whole liver  | 1380414_ε | Bcl3   | 2.492361    | 0.000484 | LPS       |
| LPS vs Veh  | Norway Ra | whole liver  | 1398482_ε | Bcl3   | 2.597225    | 0.012396 | LPS       |
| LPS vs Veh  | Norway Ra | whole liver  | 1380414_ε | Bcl3   | 2.487383    | 0.000496 | LPS       |
| LPS vs Veh  | Norway Ra | whole liver  | 1385627_ε | Bcl3   | 2.052888    | 0.006553 | LPS       |
| IL1B vs Veh | Human     | hepatocyte   | 204908_s_ | BCL3   | 2.107252    | 2.5E-09  | IL1B      |
| LPS vs Veh  | House Moi | myeloid lir  | 1418133_ε | Bcl3   | 4.858643    | 1.62E-08 | LPS       |
| TNF vs Veh  | Human     | epidermis,   | ILMN_1711 | BCL3   | 5.469214    | 9.85E-08 | TNF       |
| IL1B vs Veh | Human     | hepatocyte   | 204908_s_ | BCL3   | 2.19696     | 1.1E-09  | IL1B      |
| LPS vs Veh  | Norway Ra | whole liver  | 1385627_ε | Bcl3   | 4.576919    | 5.39E-07 | LPS       |
| LPS vs Veh  | Norway Ra | whole liver  | 1398482_ε | Bcl3   | 7.712182    | 2.25E-06 | LPS       |
| TNF vs Veh  | Human     | epidermis,   | ILMN_1711 | BCL3   | 3.268819    | 0.000011 | TNF       |
| LPS vs Veh  | House Moi | whole liver  | 1418133_ε | Bcl3   | 2.153395    | 0.001591 | LPS       |
| LPS vs Veh  | Norway Ra | whole liver  | 1398482_ε | Bcl3   | 2.427828    | 0.019411 | LPS       |
| IL6 vs Veh  | Human     | hepatocyte   | 204908_s_ | BCL3   | 2.328255    | 1.46E-08 | IL6       |
| LPS vs Veh  | Norway Ra | whole liver  | 1398482_ε | Bcl3   | 2.562114    | 0.013588 | LPS       |
| IL1B vs Veh | Human     | hepatocyte   | 204908_s_ | BCL3   | 2.198495    | 1.1E-09  | IL1B      |
| LPS vs Veh  | Norway Ra | whole liver  | 1385627_ε | Bcl3   | 2.056721    | 0.006429 | LPS       |
| TGFB1 vs V  | House Moi | epithelium   | 1418133_ε | Bcl3   | 2.304235    | 2.47E-05 | TGFB1     |
| LPS vs Veh  | Norway Ra | whole liver  | 1380414_ε | Bcl3   | 2.186874    | 0.002252 | LPS       |
| LPS vs Veh  | Norway Ra | whole liver  | 1380414_ε | Bcl3   | 2.118609    | 0.003225 | LPS       |
| TNF + EVs   | Human     | myeloid lir  | A_23_P46  | BCL3   | 3.379305    | 0.000185 | TNF       |
| LPS vs Veh  | Norway Ra | whole liver  | 1385627_ε | Bcl3   | 2.063246    | 0.006222 | LPS       |
| LPS vs Veh  | House Moi | ventricle, v | 1418133_ε | Bcl3   | 3.070556    | 4.29E-06 | LPS       |
| IL6 vs Veh  | House Moi | hepatocyte   | 1418133_ε | Bcl3   | 2.192341    | 2.14E-05 | IL6       |
| TNF vs Veh  | Norway Ra | whole liver  | 1398482_ε | Bcl3   | 3.380392    | 0.000413 | TNF       |
| LPS vs Veh  | Norway Ra | whole liver  | 1398482_ε | Bcl3   | 2.472971    | 0.017202 | LPS       |
| LPS vs Veh  | Norway Ra | whole liver  | 1380414_ε | Bcl3   | 3.662326    | 3.85E-06 | LPS       |
| IL6 vs Veh  | Human     | hepatocyte   | 204908_s_ | BCL3   | 2.084584    | 1.15E-07 | IL6       |
| LPS vs Veh  | Norway Ra | whole liver  | 1385627_ε | Bcl3   | 3.058034    | 0.000073 | LPS       |
| TNF vs Veh  | Norway Ra | whole liver  | 1398482_ε | Bcl3   | 2.400989    | 0.008244 | TNF       |
| TNF vs Veh  | Human     | epidermis,   | ILMN_1711 | BCL3   | 3.187529    | 1.42E-05 | TNF       |
| LPS vs Veh  | Norway Ra | whole liver  | 1380414_ε | Bcl3   | 3.678189    | 3.64E-06 | LPS       |
| IL6 vs Veh  | House Moi | whole liver  | 1418133_ε | Bcl3   | 2.095324    | 0.027348 | IL6       |
| LPS vs Veh  | House Moi | ventricle, v | 1418133_ε | Bcl3   | 4.419092    | 7.17E-08 | LPS       |
| LPS vs Veh  | House Moi | whole liver  | 1418133_ε | Bcl3   | 5.445285    | 1.72E-06 | LPS       |

|                                  |              |                 |          |          |         |
|----------------------------------|--------------|-----------------|----------|----------|---------|
| LPS vs Veh Norway Ra whole liver | 1398482_ε    | Bcl3            | 11.63733 | 7.21E-08 | LPS     |
| LPS vs Veh Norway Ra whole liver | 1385627_ε    | Bcl3            | 3.381128 | 2.18E-05 | LPS     |
| TNF vs Veh Norway Ra whole liver | 1398482_ε    | Bcl3            | 2.223592 | 0.015142 | TNF     |
| IL6 vs Veh Human                 | hepatocyte   | 204908_s_ BCL3  | 2.008681 | 2.41E-07 | IL6     |
| IL1B vs Veh Human                | hepatocyte   | 204908_s_ BCL3  | 2.058651 | 4E-09    | IL1B    |
| TNF vs Veh Human                 | hepatocyte   | 204908_s_ BCL3  | 2.022049 | 2E-07    | TNF     |
| IL6 vs Veh Human                 | hepatocyte   | 204908_s_ BCL3  | 2.099584 | 1E-07    | IL6     |
| LPS vs Veh Norway Ra whole liver | 1385627_ε    | Bcl3            | 2.096701 | 0.005265 | LPS     |
| LPS vs Veh Norway Ra whole liver | 1385627_ε    | Bcl3            | 4.222079 | 1.44E-06 | LPS     |
| LPS vs Veh Norway Ra whole liver | 1398482_ε    | Bcl3            | 5.245665 | 5.65E-05 | LPS     |
| IL6 vs Veh Human                 | hepatocyte   | 204908_s_ BCL3  | 2.3857   | 9.5E-09  | IL6     |
| IL6 vs Veh Human                 | hepatocyte   | 204907_s_ BCL3  | 2.063463 | 1.67E-06 | IL6     |
| LPS vs Veh Human                 | hepatocyte   | 204908_s_ BCL3  | 2.098664 | 7.7E-08  | LPS     |
| TNF vs Veh Human                 | myeloid lir  | A_23_P46( BCL3  | 3.209034 | 0.000264 | TNF     |
| P3CSK4 vs Human                  | myeloid lir  | BCL3 960( BCL3  | 3.068522 | 0.000251 | P3CSK4  |
| DEX vs Veh Human                 | osteoblast:  | 204908_s_ BCL3  | -2.37076 | 1.6E-09  | DEX     |
| DEX vs Veh Human                 | osteoblast:  | A_23_P46( BCL3  | -5.34867 | 3E-10    | DEX     |
| DEX vs Veh Human                 | osteoblast:  | A_23_P46( BCL3  | -5.18254 | 4E-10    | DEX     |
| DEX vs Veh House Moi             | whole liver  | A_51_P13( Bcl3  | -2.97125 | 0.016511 | DEX     |
| DEX vs Veh Human                 | epithelium   | ILMN_171( BCL3  | -2.4007  | 0.000384 | DEX     |
| DEX vs Veh Human                 | osteoblast:  | A_23_P46( BCL3  | -5.09418 | 5E-10    | DEX     |
| LIF vs Veh House Moi             | pituitary, c | 1418133_ε Bcl3  | 6.758471 | 1.75E-07 | LIF     |
| LIF vs Veh House Moi             | pituitary, c | 1418133_ε Bcl3  | 5.217156 | 5.97E-07 | LIF     |
| Dex + LIF v House Moi            | pituitary, c | 1418133_ε Bcl3  | 5.543989 | 4.41E-07 | DEX,LIF |
| Dex + LIF v House Moi            | pituitary, c | 1418133_ε Bcl3  | 5.261682 | 5.72E-07 | DEX,LIF |
| 125DVD3 \ Human                  | myeloid lir  | 204907_s_ BCL3  | 2.29902  | 0.007805 | 125DVD3 |
| 125DVD3 \ Human                  | epithelium   | 204908_s_ BCL3  | 2.270671 | 3.73E-05 | 125DVD3 |
| ATRA vs Ve Human                 | myeloid lir  | 204907_s_ BCL3  | 7.855398 | 0.001219 | ATRA    |
| ATRA vs Ve House Moi             | pluripoten   | Bcl3 1009( Bcl3 | -2.75604 | 1.61E-06 | ATRA    |
| ATRA vs Ve House Moi             | pluripoten   | Bcl3 1009( Bcl3 | -6.31595 | 0.00005  | ATRA    |

**BCL6**

**INTERFEROME DATA**

| DATASET ID | FOLD      | TREATMEN | TYPE OF    | PROBESET   | PROMOTER TF DATA<br>STAT1,STAT3,NF-KB,IRF |
|------------|-----------|----------|------------|------------|-------------------------------------------|
|            | INDUCTION | TIME     | INTERFERON |            |                                           |
| 26         | 3.1       | 2 HR     | TYPE I     | 203140_at  |                                           |
| 377        | 2         | 4 HR     | TYPE I     | 1421818_at |                                           |

**TRANSCRIPTOMIC DATA**

| Experimen  | Species   | Tissue      | Probe     | Symbol | Fold Chang | P-value  | TREATMENT |
|------------|-----------|-------------|-----------|--------|------------|----------|-----------|
| IFNA1 vs V | Human     | hepatocyt   | 215990_s_ | BCL6   | 2.574703   | 4.29E-08 | IFNA1     |
| IFNA1 vs V | Human     | hepatocyt   | 215990_s_ | BCL6   | 2.743578   | 1.84E-08 | IFNA1     |
| IFNA1 vs V | Human     | hepatocyt   | 203140_at | BCL6   | 3.461544   | 0        | IFNA1     |
| IFNA1 vs V | Human     | hepatocyt   | 203140_at | BCL6   | 2.718479   | 0        | IFNA1     |
| LPS vs Veh | House Mo  | whole liver | 1421818_  | Bcl6   | 2.967737   | 0.045892 | LPS       |
| LPS vs Veh | Norway Ra | whole liver | 1379368_  | Bcl6   | 5.934082   | 0.00498  | LPS       |
| IL6 vs Veh | Human     | epithelium  | 215990_s_ | BCL6   | -2.0305    | 0.03475  | IL6       |
| IL1B vs Ve | Human     | hepatocyt   | 203140_at | BCL6   | 2.071135   | 0        | IL1B      |
| TGFB1 vs V | House Mo  | bone marr   | A_52_P16  | Bcl6   | 2.066521   | 1.14E-05 | TGFB1     |
| TGFB1 vs V | House Mo  | epithelium  | 1421818_  | Bcl6   | 2.04782    | 0.000158 | TGFB1     |
| TGFB1 vs V | House Mo  | epithelium  | 1421818_  | Bcl6   | 2.262007   | 7.49E-05 | TGFB1     |
| TGFB1 vs V | House Mo  | epithelium  | 1421818_  | Bcl6   | 2.440173   | 1.92E-05 | TGFB1     |
| IL6 vs Veh | Human     | hepatocyt   | 203140_at | BCL6   | 3.390614   | 0        | IL6       |
| IL6 vs Veh | Human     | hepatocyt   | 203140_at | BCL6   | 2.750324   | 0        | IL6       |
| IL6 vs Veh | Human     | epithelium  | 203140_at | BCL6   | -2.6132    | 0.00067  | IL6       |
| LPS vs Veh | Human     | hepatocyt   | 203140_at | BCL6   | 2.331652   | 2E-10    | LPS       |
| LPS vs Veh | House Mo  | whole liver | 1421818_  | Bcl6   | 3.644268   | 6.39E-06 | LPS       |
| DEX vs Ve  | House Mo  | other, neu  | 1450381_  | Bcl6   | 2.13359    | 1.13E-07 | DEX       |
| DEX vs Ve  | House Mo  | other, neu  | 1421818_  | Bcl6   | 3.623291   | 3E-10    | DEX       |
| LPS vs Veh | Norway Ra | whole liver | 1379368_  | Bcl6   | 3.489737   | 0.042668 | LPS       |
| IL6 vs Veh | Human     | hepatocyt   | 215990_s_ | BCL6   | 2.914916   | 0.000014 | IL6       |
| TNF vs Veh | Human     | epidermis,  | ILMN_173  | BCL6   | 3.080802   | 7.62E-05 | TNF       |
| IL1B vs Ve | Human     | hepatocyt   | 203140_at | BCL6   | 2.161568   | 0        | IL1B      |
| LPS vs Veh | Norway Ra | whole liver | 1379368_  | Bcl6   | 6.53881    | 0.003238 | LPS       |
| TNF vs Veh | Human     | epithelium  | 8092691   | BCL6   | 2.119827   | 0.000117 | TNF       |
| LPS vs Veh | House Mo  | myeloid lir | 1450381_  | Bcl6   | 2.548232   | 1.59E-07 | LPS       |
| IL6 vs Veh | Human     | hepatocyt   | 228758_at | BCL6   | 2.060861   | 5.43E-07 | IL6       |
| IL6 vs Veh | Human     | epithelium  | 215990_s_ | BCL6   | -3.46765   | 0.002133 | IL6       |
| LPS vs Veh | House Mo  | whole liver | 1421818_  | Bcl6   | 3.233368   | 2.94E-05 | LPS       |
| IL6 vs Veh | Human     | hepatocyt   | 203140_at | BCL6   | 3.476582   | 0        | IL6       |
| IL6 vs Veh | Human     | hepatocyt   | 215990_s_ | BCL6   | 2.736582   | 2.87E-05 | IL6       |
| IL1B vs Ve | Human     | hepatocyt   | 203140_at | BCL6   | 2.022742   | 0        | IL1B      |
| IL1B vs Ve | Human     | hepatocyt   | 203140_at | BCL6   | 2.128554   | 0        | IL1B      |
| IL1B vs Ve | Human     | hepatocyt   | 215990_s_ | BCL6   | 2.043159   | 3.07E-07 | IL1B      |
| DEX vs Veh | Norway Ra | whole liver | A_44_P10  | Bcl6   | 4.522341   | 0.01273  | DEX       |
| DEX vs Veh | Norway Ra | whole liver | A_44_P10  | Bcl6   | 6.927343   | 0.003049 | DEX       |
| DEX vs Ve  | Norway Ra | whole liver | 1379368_  | Bcl6   | 7.664973   | 3.73E-05 | DEX       |

|                                    |                 |          |          |         |
|------------------------------------|-----------------|----------|----------|---------|
| DEX vs Veh Norway Ra whole liver   | 1379368_ε Bcl6  | 5.422809 | 0.000403 | DEX     |
| DEX vs Veh Norway Ra whole liver   | 1379368_ε Bcl6  | 4.593792 | 0.001203 | DEX     |
| DEX vs Veh House Mouse cerebrum,   | 1421818_ε Bcl6  | 2.499747 | 9E-10    | DEX     |
| DEX vs Veh Human epithelium        | ILMN_173' BCL6  | 2.143576 | 1E-10    | DEX     |
| ATRA vs Veh Human pluripoten       | 228758_at BCL6  | 5.541184 | 2.02E-06 | ATRA    |
| RIP140/NR Human pluripoten         | 228758_at BCL6  | 4.138849 | 1.01E-05 | ATRA    |
| RIP140/NR Human pluripoten         | 228758_at BCL6  | 4.138849 | 1.01E-05 | ATRA    |
| RIP140/NR Human pluripoten         | 203140_at BCL6  | 3.585089 | 2E-05    | ATRA    |
| RIP140/NR Human pluripoten         | 203140_at BCL6  | 3.585089 | 2E-05    | ATRA    |
| ATRA vs Veh House Mouse pluripoten | Bcl6 1009  Bcl6 | 2.656093 | 0.00001  | ATRA    |
| ATRA vs Veh Human pluripoten       | 215990_s_ BCL6  | 6.052565 | 0.005373 | ATRA    |
| ATRA vs Veh Human pluripoten       | 228758_at BCL6  | 3.213533 | 5.09E-05 | ATRA    |
| ATRA vs Veh Human pluripoten       | 203140_at BCL6  | 3.690208 | 1.66E-05 | ATRA    |
| 125DVD3 \ Human myeloid lir        | 215990_s_ BCL6  | 3.26518  | 0.00438  | 125DVD3 |
| 125DVD3 \ Human myeloid lir        | 8092691 BCL6    | 2.143376 | 1.28E-05 | 125DVD3 |
| 125DVD3 \ Human myeloid lir        | 203140_at BCL6  | 13.29916 | 1.06E-06 | 125DVD3 |
